## Short Communication

# Evidence for Increasingly Variable Drought Conditions in the United States Since 1895

Sierra Rayne <sup>a,\*</sup> and Kaya Forest <sup>b</sup>

<sup>a</sup> Chemologica Research, 1617-11th Avenue NW, Moose Jaw, Saskatchewan, Canada, S6H 6M5

<sup>b</sup> Department of Environmental Engineering, Saskatchewan Polytechnic, Palliser Campus, 600-6th Avenue NW, PO Box 1420, Moose Jaw, Saskatchewan, Canada, S6H 4R4

\* Corresponding author. Tel.: +1 306 630 1422. E-mail address: [sierra.rayne@alumni.ubc.ca](mailto:sierra.rayne@alumni.ubc.ca).

## Abstract

Annual and summertime trends towards increasingly variable values of the Palmer Drought Severity Index (PDSI) over a sub-decadal period (five years) were investigated within the contiguous United States between 1895 and the present. For the contiguous U.S. as a whole, there is a significant increasing trend in the five-year running minimum-maximum ranges for the annual PDSI ( $aPDSI_{5yr(min|max\ range)}$ ). During this time frame, the average  $aPDSI_{5yr(min|max\ range)}$  has increased by about one full unit, indicating a substantial increase in drought variability over short time scales across the United States. The end members of the running  $aPDSI_{5yr(min|max\ range)}$  highlight even more rapid changes in the drought index variability within the past 120 years. This increasing variability in the  $aPDSI_{5yr(min|max\ range)}$  is driven primarily by changes taking place in the Pacific and Atlantic Ocean coastal climate regions, climate regions which collectively comprise one-third the area of the contiguous U.S. Overall, interannual drought patterns are becoming more extreme and difficult to predict, posing a challenge to agricultural and other water-resource related planning efforts.

## Keywords:

Drought; Time trends; Hydroclimatic variability; United States; Palmer Drought Severity Index

# 1. Introduction

The severe ecological and socio-economic impacts of droughts have led many to consider the potential effects of climate change on the frequency, duration, and intensity of these phenomena (Kallis 2008). At a global scale, drought is expected to increase in frequency and intensity during the twenty-first century (Dai et al. 2004; Briffa et al. 2009; Burke et al. 2006; Sheffield and Wood 2008a; Dai 2011a), although there is modest disagreement as to the magnitude and direction of any recent trends (Dai 2011b; Sheffield and Wood 2008b). Furthermore, in addition to established anthropogenic forcings, various natural climate cycles (e.g., El Nino-Southern Oscillation [ENSO], Atlantic Multi-Decadal Oscillation [AMO], Pacific Decadal Oscillation [PDO]) can also complicate time trend analyses of drought conditions (Cole et al. 2002; Cook et al. 2010; Dai 2011a; Hidalgo 2004; McCabe et al. 2004; Seager and Vecchi 2010; Woodhouse and Overpeck 1998).

In response to these challenges, various measures for assessing drought conditions have been developed (Dai 2011b; Heim 2002; Kallis 2008; Keyantash and Dracup 2002; Piechota and Dracup 1996), but the Palmer suite of indices (e.g., Palmer Drought Severity Index [PDSI]) remains in wide application. Whereas flaws in the PDSI and related approaches for drought determination and prediction have been broadly discussed (Alley 1984; Andreadis et al. 2005; Briffa et al. 2009; Dai 2011b; Dai et al. 2004; Heim 2002; Hoerling et al. 2013; Kallis 2008; Keyantash and Dracup 2002; Piechota and Dracup 1996; Sheffield et al. 2012), the general consensus appears to be that PDSI-related metrics still offer primary utility for climate change studies.

In the United States, prior work has shown historical trends and predictions toward increasingly

frequent and severe droughts and a generally drier hydroclimate in the western and southwestern regions (Andreadis and Lettenmaier 2006; Cayan et al. 2010; Cook et al. 2004; Seager et al. 2007, 2013; Schwalm et al. 2012; Sheffield and Wood 2008b) and no clear changes, or reduced drought conditions, in the rest of the nation (Andreadis and Lettenmaier 2006; Dai et al. 2004; Seager et al. 2009). Recent modeling work suggests the the Great Plains region will be in semi-permanent severe drought over the coming century (Hoerling et al. 2013).

Overall, current observable trends for regional drought indices in the United States are in agreement with climate models that associate substantial portions of the changes to anthropogenic causes, thereby warranting additional mechanistic and empirical studies. In the current work, we extend these investigations to the question of whether drought conditions in the United States are becoming more variable over sub-decadal periods of time.

## **2. Datasets and Methods**

Data was obtained from the National Centers for Environmental Information of the National Oceanic and Atmospheric Administration (<https://www.ncdc.noaa.gov/cag/>). Individual climate regions (Karl and Koss 1984) under more detailed examination comprise the following states: Northwest (Idaho, Oregon, and Washington); West (California and Nevada); Northeast (Connecticut, Delaware, Maine, Maryland, Massachusetts, New Hampshire, New Jersey, New York, Pennsylvania, Vermont, and Rhode Island).

Statistical analyses of climate data were conducted using the nonparametric Mann-Kendall test for the

trend and the nonparametric Sen's method for the magnitude of the trend (Kendall 1975; Mann 1945; Salmi et al. 2002) within the R Project for Statistical Computing environment (R Core Team 2012). Parametric linear regressions and non-parametric Spearman rank correlations were performed with KyPlot (v.2.0b15) (Yoshioka 2002).

### 3. Results and Discussion

Temporal alterations in drought variability can be investigated by considering trends in the five-year running minimum-maximum ranges for the annual Palmer Drought Severity Index ( $aPDSI_{5yr(min|max \ range)}$ ) over this time frame. Such metrics capture cases whereby widely varying drought conditions (e.g., an extreme dry year is followed by an extreme wet year) are becoming more prevalent. For the contiguous U.S., there is a significant ( $p=0.076/0.14/0.18$ ; parametric linear/Mann-Kendall/Spearman rank;  $m=0.0085\pm0.0047$  [SE] PDSI units/yr) increasing trend in the  $aPDSI_{5yr(min|max \ range)}$  between 1895 and 2014 (Figure 1). No corresponding significant trend is present for the  $aPDSI_{5yr(min|max \ range)}$  residuals, supporting the assignment of a linear trend analysis. During this period, the average  $aPDSI_{5yr(min|max \ range)}$  has increased by about one full unit, representing a substantial increase in drought variability over short time scales across the United States. Consequently, during a half-decade, interannual drought patterns are becoming more extreme and difficult to predict, posing a challenge to agricultural and other water-resource related planning efforts.

The end members of the running  $aPDSI_{5yr(min|max \ range)}$  highlight even more rapid changes in the drought index variability. In the late 1890s and early 1900s,  $aPDSI_{5yr(min|max \ range)}$  on the order of 1.0 -- indicating very low inter-annual variability (i.e., climatic stability) -- were evident. By mid-century, the lowest

$aPDSI_{5yr(min|max range)}$  had increased up to 1.5 PDSI units, reaching two PDSI units by the early 1970s. Since 1999, the lowest  $aPDSI_{5yr(min|max range)}$  was 3.5 between 2006 and 2009. At the high end of the scale,  $aPDSI_{5yr(min|max range)}$  of less than 7 PDSI units were the maximum occurrences in the early 20th century. By mid-century, the variability had increased to  $\sim 7.5$  PDSI units, and in 2000/2001 the index reached a record-high 8.74 PDSI units when the U.S. as a whole abruptly swung from an extreme wet year in 1997 (PDSI=4.30) to an extreme drought year (PDSI=-4.44) just three years later in 2000. This 5-year drought variability from 1997 through 2000 far exceeded any prior maximum variation in the historical record, but also fits into the upper envelope trendline for maximum  $aPDSI_{5yr(min|max range)}$  since 1895.

The increasing variability in the  $aPDSI_{5yr(min|max range)}$  is driven primarily by changes taking place in the Pacific and Atlantic Ocean coastal climate regions (Northwest, West, Northeast, and Southeast). Highly significant increasing trends in the  $aPDSI_{5yr(min|max range)}$  are evident since 1895 in the Northwest ( $p=0.0004/0.0006/0.0006$ ;  $m=0.013\pm 0.003$  PDSI units/yr), West ( $p=2\times 10^{-12}/2\times 10^{-16}/2\times 10^{-9}$ ;  $m=0.035\pm 0.004$  PDSI units/yr), Northeast ( $p=0.003/0.002/0.003$ ;  $m=0.0081\pm 0.0027$  PDSI units/yr), and Southeast ( $p=0.003/0.003/0.006$ ;  $m=0.011\pm 0.004$  PDSI units/yr) regions. Analogous significant trends towards increasingly variable five-year PDSI ranges are present for these climate regions during the summer months between 1895 and 2015 ( $sPDSI_{5yr(min|max range)}$ ; Figure 3): Northwest,  $p=0.0006/0.0006/0.0008$ ,  $m=0.014\pm 0.004$  PDSI units/yr; West,  $p=6\times 10^{-11}/2\times 10^{-16}/4\times 10^{-9}$ ,  $m=0.039\pm 0.005$  PDSI units/yr; Northeast,  $p=4\times 10^{-8}/<10^{-16}/4\times 10^{-8}$ ,  $m=0.018\pm 0.003$  PDSI units/yr; and Southeast,  $p=0.003/0.047/0.02$ ,  $m=0.015\pm 0.005$  PDSI units/yr.

Together, these climate regions comprise one-third the area of the contiguous U.S. The patterns over time display strong correlations with respective regional temperature trends, as well as with Northern

Hemisphere ocean temperature increases since the late 19th century, which collectively have been linked to anthropogenic drivers (IPCC 2013, 2014a, 2014b). The effects of the cool (1890 to 1924 and 1947 to 1976) and warm (1925 to 1946 and 1977 to the mid-1990s) Pacific Decadal Oscillation (PDO) regimes (Trenberth 1990; Latif and Barnett 1994; Trenberth and Hurrell 1994; Minobe 1997; Zhang et al. 1997; Barnett et al. 1999; Nigam et al. 1999) show up clearly in the Northwest climate region  $aPDSI_{5yr(min|max range)}$  and  $sPDSI_{5yr(min|max range)}$  time trends, with the largest  $a/sPDSI_{5yr(min|max range)}$  taking place during warm PDO phases. However, only modest, positive correlations we obtain between the 1900-2014 annual average and summertime PDO indices (<http://research.jisao.washington.edu/pdo/PDO.latest>) and the corresponding  $aPDSI_{5yr(min|max range)}$  ( $r=+0.34$ ;  $p=0.0002$ ) and  $sPDSI_{5yr(min|max range)}$  ( $r=+0.12$ ;  $p=0.20$ ) suggests this natural climatic variability plays only a minor role in the observed increasing drought variability for this area.

In conclusion, drought variability within five-year running period sub-decadal time scales is rapidly increasing in the coastal climate regions of the United States and for the contiguous nation as a whole. Further mechanistic studies are warranted to determine the potential causal underpinnings of these trends, but at present, known natural cycles do not appear capable of explaining the changes.

## References

- Alley, W., 1984. The Palmer Drought Severity Index: Limitations and assumptions. *J. Clim. Appl. Meteorol.* 23, 1100-1109.
- Andreadis, K., Clark, E., Wood, A., Hamlet, A., Lettenmaier, D., 2005. Twentieth-century drought in the conterminous United States. *J. Hydrometeorol.* 6, 985-1001.
- Andreadis, K., Lettenmaier, D., 2006. Trends in 20th century drought over the continental United States. *Geophys. Res. Lett.* 33, L10403.
- Barnett, T. P., Pierce, D. W., Latif, M., Dommenges, D., Saravanan, R., 1999. Interdecadal interactions between the tropics and midlatitudes in the Pacific basin. *Geophys. Res. Lett.* 26, 615-618
- Bond, N. A., Harrison, D. E., 2000. The Pacific Decadal Oscillation, air-sea interaction and central north Pacific winter atmospheric regimes. *Geophys. Res. Lett.* 27, 731-734
- Briffa, K., van der Schrier, G., Jones, P., 2009. Wet and dry summers in Europe since 1750: Evidence of increasing drought. *Int. J. Climatol.* 29, 1894-1905.
- Burke, E., Brown, S., Christidis, N., 2006. Modeling the recent evolution of global drought and projections for the twenty-first century with the Hadley Centre Climate Model. *J. Hydrometeorol.* 7, 1113-1125.



Cayan, D., Das, T., Pierce, D., Barnett, T., Tyree, M., Gershunov, A., 2010. Future dryness in the southwest US and the hydrology of the early 21st century drought. *P. Natl. Acad. Sci. USA* 107, 21271-21276.

Cole, J., Overpeck, J., Cook, E., 2002, Multiyear La Nina events and persistent drought in the contiguous United States. *Geophys. Res. Lett.* 29, 1647.

Cook, E., Woodhouse, C., Eakin, C., Meko, D., Stahle, D., 2004. Long-term aridity changes in the western United States. *Science* 306, 1015-1018.

Cook, E., Seager, R., Heim, R., Vose, R., Herweijer, C., Woodhouse, C., 2010. Megadroughts in North America: Placing IPCC projections of hydroclimatic change in a long-term palaeoclimate context. *J. Quaternary Sci.* 25, 48-61.

Dai, A., Trenberth, K., Qian, T., 2004. A global dataset of Palmer Drought Severity Index for 1870-2002: Relationship with soil moisture and effects of surface warming. *J. Hydrometeorol.* 5, 1117-1130.

Dai, A., 2011a. Drought under global warming: A review. *Climate Change* 2, 45-65.

Dai, A., 2011b, Characteristics and trends in various forms of the Palmer Drought Severity Index during 1900-2008. *J. Geophys. Res.* 116, D12115.

Heim, R., 2002. A review of twentieth-century drought indices used in the United States. *B. Am. Meteorol. Soc.* 8, 1149-1165.

Hidalgo, H., 2004. Climate precursors of multidecadal drought variability in the western United States. *Water Resour. Res.* 40, W12504.

Hoerling, M., Eischeid, J., Quan, X., Diaz, H., Webb, R., Dole, R., Easterling, D., 2013. Is a transition to semi-permanent drought conditions imminent in the U.S. Great Plains? *J. Climate* 25, 8380-8386.

IPCC, 2013. *Climate Change 2013: The Physical Science Basis. Contribution of Working Group I to the Fifth Assessment Report of the Intergovernmental Panel on Climate Change.* Cambridge University Press, Cambridge and New York.

IPCC, 2014a. *Climate Change 2014: Impacts, Adaptation, and Vulnerability. Part A: Global and Sectoral Aspects. Contribution of Working Group II to the Fifth Assessment Report of the Intergovernmental Panel on Climate Change.* Cambridge University Press, Cambridge and New York.

IPCC, 2014b. *Climate Change 2014: Impacts, Adaptation, and Vulnerability. Part B: Regional Aspects. Contribution of Working Group II to the Fifth Assessment Report of the Intergovernmental Panel on Climate Change.* Cambridge University Press, Cambridge and New York.

Kallis, G., 2008. Droughts. *Annu. Rev. Env. Resour.* 33, 85-118.

Karl, T., Koss, W., 1984. Regional and National Monthly, Seasonal, and Annual Temperature Weighted by Area, 1895-1983, Historical Climatology Series 4-3. National Climatic Data Center, Asheville, NC.

Kendall, M., 1975. Rank Correlation Methods. Charles Griffin, London.

Keyantash, J., Dracup, J., 2002. The quantification of drought: An evaluation of drought indices. B. Am. Meteorol. Soc. 8, 1167-1180.

Latif, M., Barnett, T. P., 1994. Causes of decadal climate variability over the North Pacific and North America. Science 266, 634-637.

Mann, H., 1945. Non-parametric tests against trend. Econometrica 13, 245-259.

McCabe, G., Palecki, M., Betancourt, J., 2004. Pacific and Atlantic Ocean influences on multidecadal drought frequency in the United States. P. Natl. Acad. Sci. USA 101, 4136-4141.

Minobe, S., 1997. A 50-70 year climatic oscillation over the North Pacific and North America. Geophys. Res. Lett. 24, 683-686.

Nigam, S., Barlow, M., Berbery, E. H., 1999. Analysis links pacific decadal variability to drought and streamflow in United States. EOS 80, 621-632.

Piechota, T., Dracup, J., 1996. Drought and regional hydrologic variation in the United States:

Associations with the El Nino-Southern Oscillation. *Water Resour. Res.* 32, 1359-1373.

R Core Team, 2012. A Language and Environment for Statistical Computing. R Foundation for Statistical Computing, Vienna.

Salmi, T., Maatta, A., Anttila, P., Ruoho-Airola, T., Amnell, T., 2002. Detecting Trends of Annual Values of Atmospheric Pollutants by the Mann-Kendall Test and Sen's Slope Estimates. Finnish Meteorological Institute, Helsinki.

Schwalm, C., Williams, C., Schaefer, K., Baldocchi, D., Black, T., Goldstein, A., Law, B., Oechel, W., Tha Paw, U. K., Scott, R., 2012. Reduction in carbon uptake during turn of the century drought in western North America. *Nat. Geosci.* 5, 551-556.

Seager, R., Ting, M., Held, I., Kushnir, Y., Lu, J., Vecchi, G., Huang, H., Harnik, N., Leetmaa, A., Lau, N., Li, C., Velez, J., Naik, N. 2007. Model projections of an imminent transition to a more arid climate in southwestern North America. *Science* 316, 1181-1184.

Seager, R., Tzanova, A., Nakamura, J., 2009. Drought in the southeastern United States: Causes, variability over the last millennium, and the potential for future hydroclimate change. *J. Climate* 22, 5021-5045.

Seager, R., Ting, M., Li, C., Naik, N., Cook, B., Nakamura, J., Liu, H., 2013. Projections of declining surface-water availability for the southwestern United States. *Nature Clim. Change* 3, 482-486.

Sheffield, J., Wood, E., 2008a. Global trends and variability in soil moisture and drought characteristics, 1950-2000, from observation-driven simulations of the terrestrial hydrologic cycle. *J. Climate* 21, 432-458.

Sheffield, J., Wood, E., 2008b. Projected changes in drought occurrence under future global warming from multi-model, multi-scenario, IPCC AR4 simulations. *Clim. Dynam.* 31, 79-105.

Sheffield, J., Wood, E., Roderick, M., 2012. Little change in global drought over the past 60 years. *Nature* 491, 435-438.

Seager, R., Vecchi, G., 2010. Greenhouse warming and the 21st century hydroclimate of southwestern North America. *P. Natl. Acad. Sci. USA* 107, 21277-21282.

Trenberth, K. E., 1990. Recent observed interdecadal climate changes in the northern hemisphere. *B. Am. Meteorol. Soc.* 71, 988-993.

Trenberth, K. E., Hurrell, J. W., 1994. Decadal atmosphere-ocean variations in the Pacific. *Clim. Dyn.* 9, 303-319.

Woodhouse, C., Overpeck, J., 1998. 2000 years of drought variability in the central United States. *B. Am. Meteorol. Soc.* 79, 2693-2714.

Yoshioka, K., 2002. KyPlot: A user-oriented tool for statistical data analysis and visualization.

Computational Statistics 17, 425-437,

Zhang, Y., Wallace, J. M., Battisti, D. S., 1997. ENSO-like interdecadal variability: 1900-93. J. Climate 10, 1004-1020.

## Figure Captions

**Figure 1.** Five-year running minimum-maximum ranges for the annual Palmer Drought Severity Index ( $aPDSI_{5yr(min|max range)}$ ) over the contiguous United States between 1895 and 2014. Dashed, dashed-dot, and dashed-dot-dot lines are upper and lower 90%, 95%, and 99% confidence intervals about the regression line (solid). Inset shows residuals for the linear regression in the main figure. Dotted lines and shading encompass the minimum-maximum envelope in  $aPDSI_{5yr(min|max range)}$  as it evolves over time.

**Figure 2.** Five-year running minimum-maximum ranges for the annual Palmer Drought Severity Index ( $aPDSI_{5yr(min|max range)}$ ) in the Northwest, West, Northeast, and Southeast climate regions between 1895 and 2014. The dashed-dot lines are upper and lower 95% confidence intervals about the regression line (solid).

**Figure 3.** Five-year running minimum-maximum ranges for the summertime (June to August) Palmer Drought Severity Index ( $sPDSI_{5yr(min|max range)}$ ) in the Northwest, West, Northeast, and Southeast climate regions between 1895 and 2014. The dashed-dot lines are upper and lower 95% confidence intervals about the regression line (solid).

## Figures

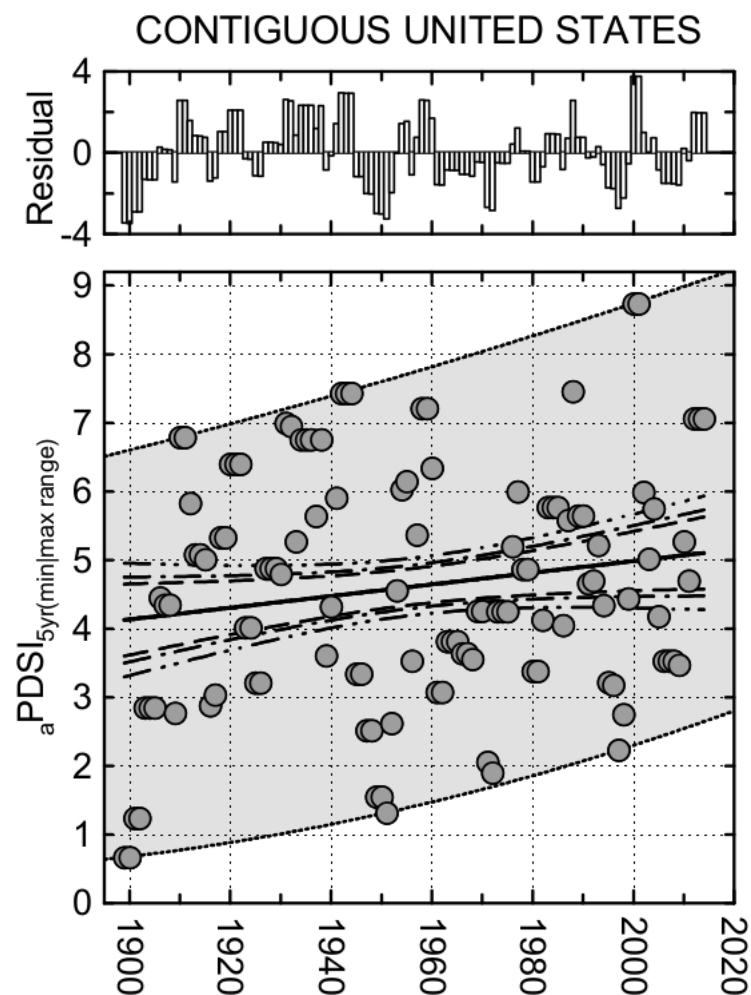

Figure 1.



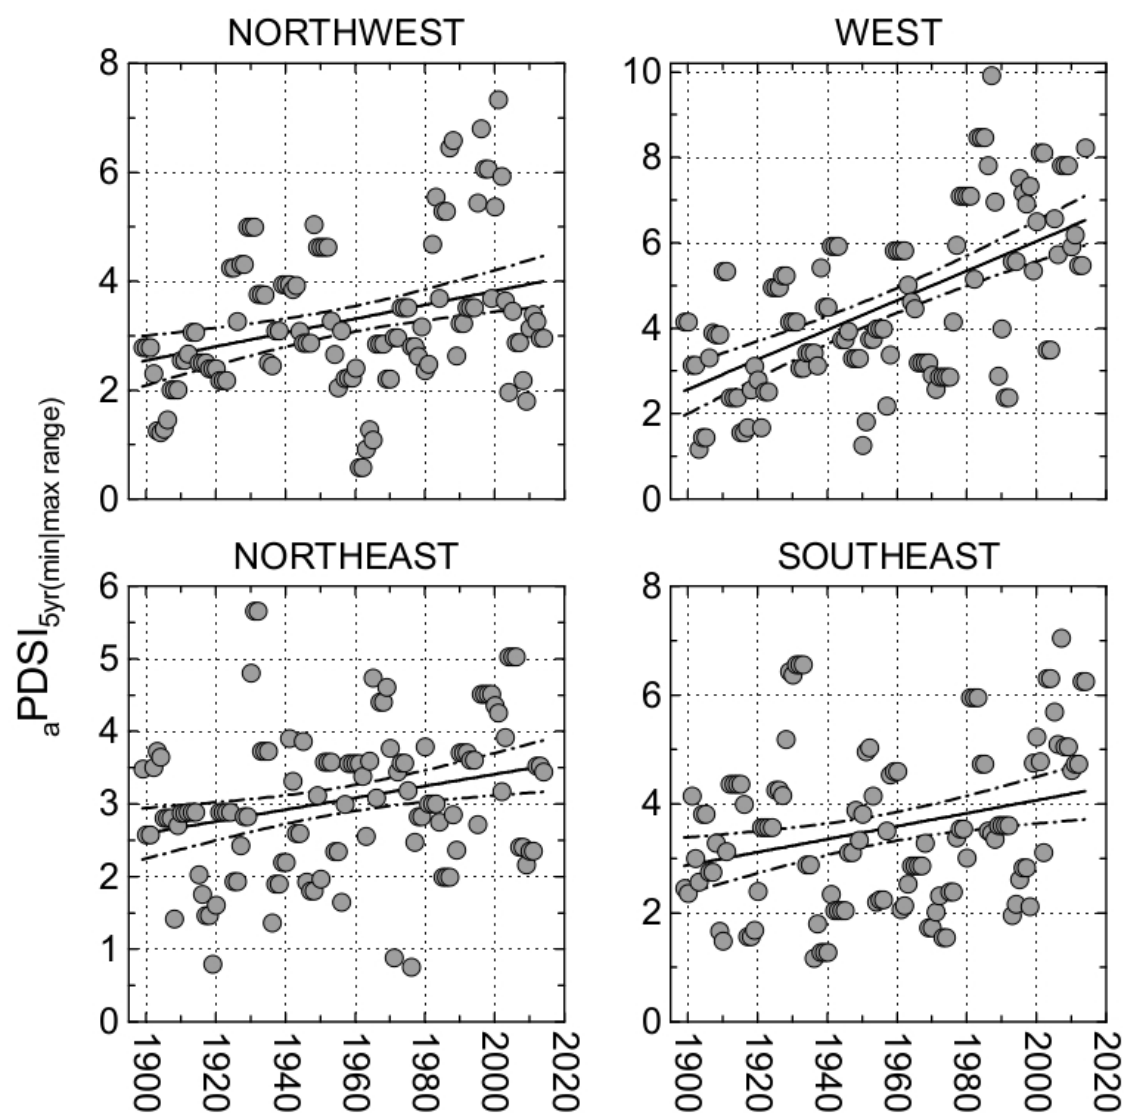

Figure 2.

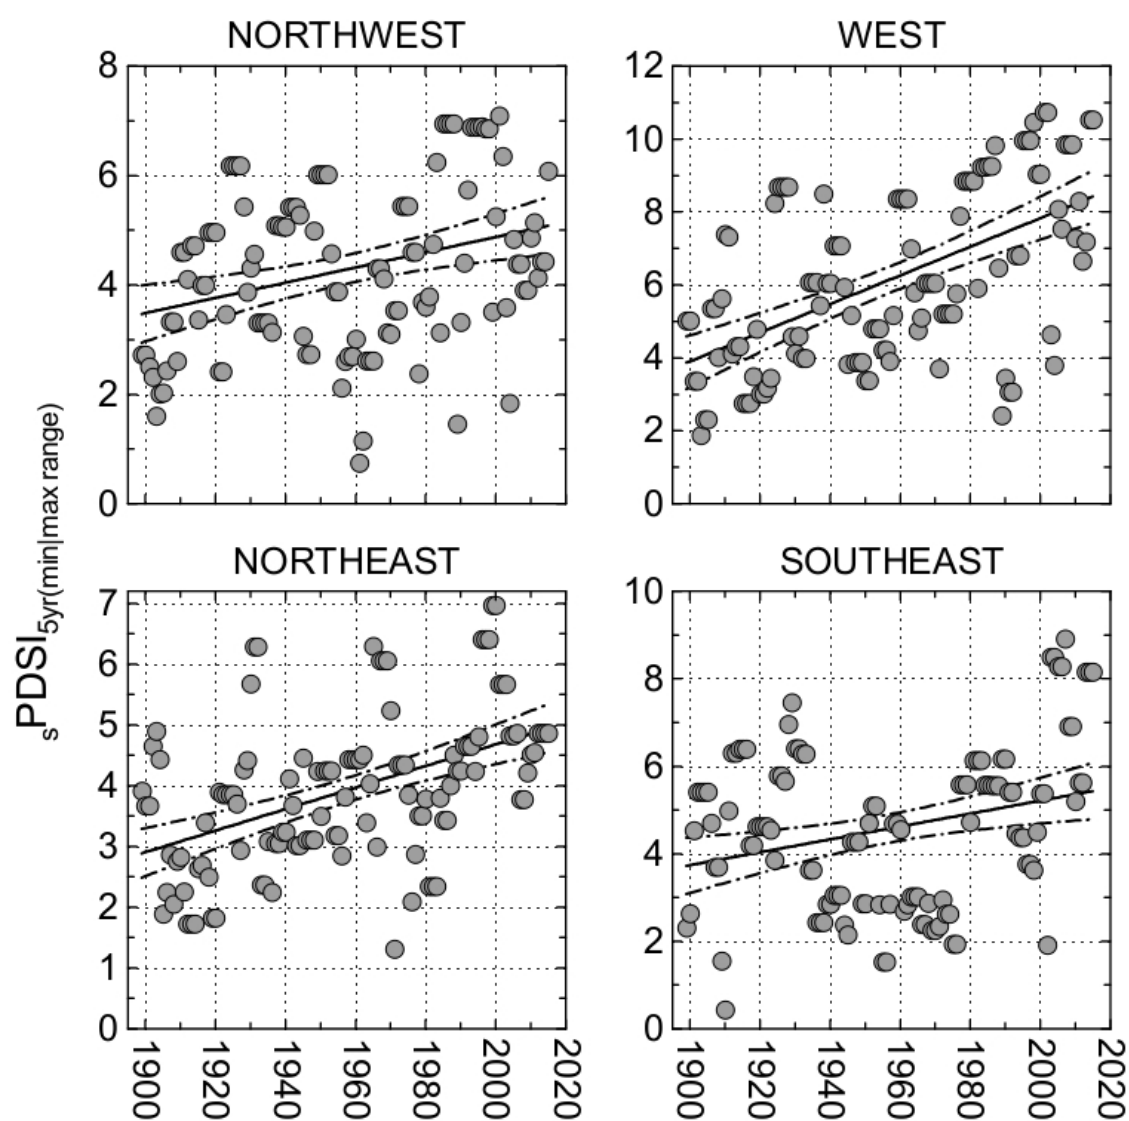

Figure 3.
